# Supplementary material for: Ecology determines how low antibiotic concentration impacts community composition and horizontal transfer of resistance genes
Source: PubMed Central journal article supplement (PMC6123812; doi:10.1038/s42003-018-0041-7), 2018-04-19
Supplement: 42003_2018_41_MOESM1_ESM.pdf [file 42003_2018_41_MOESM1_ESM.pdf]

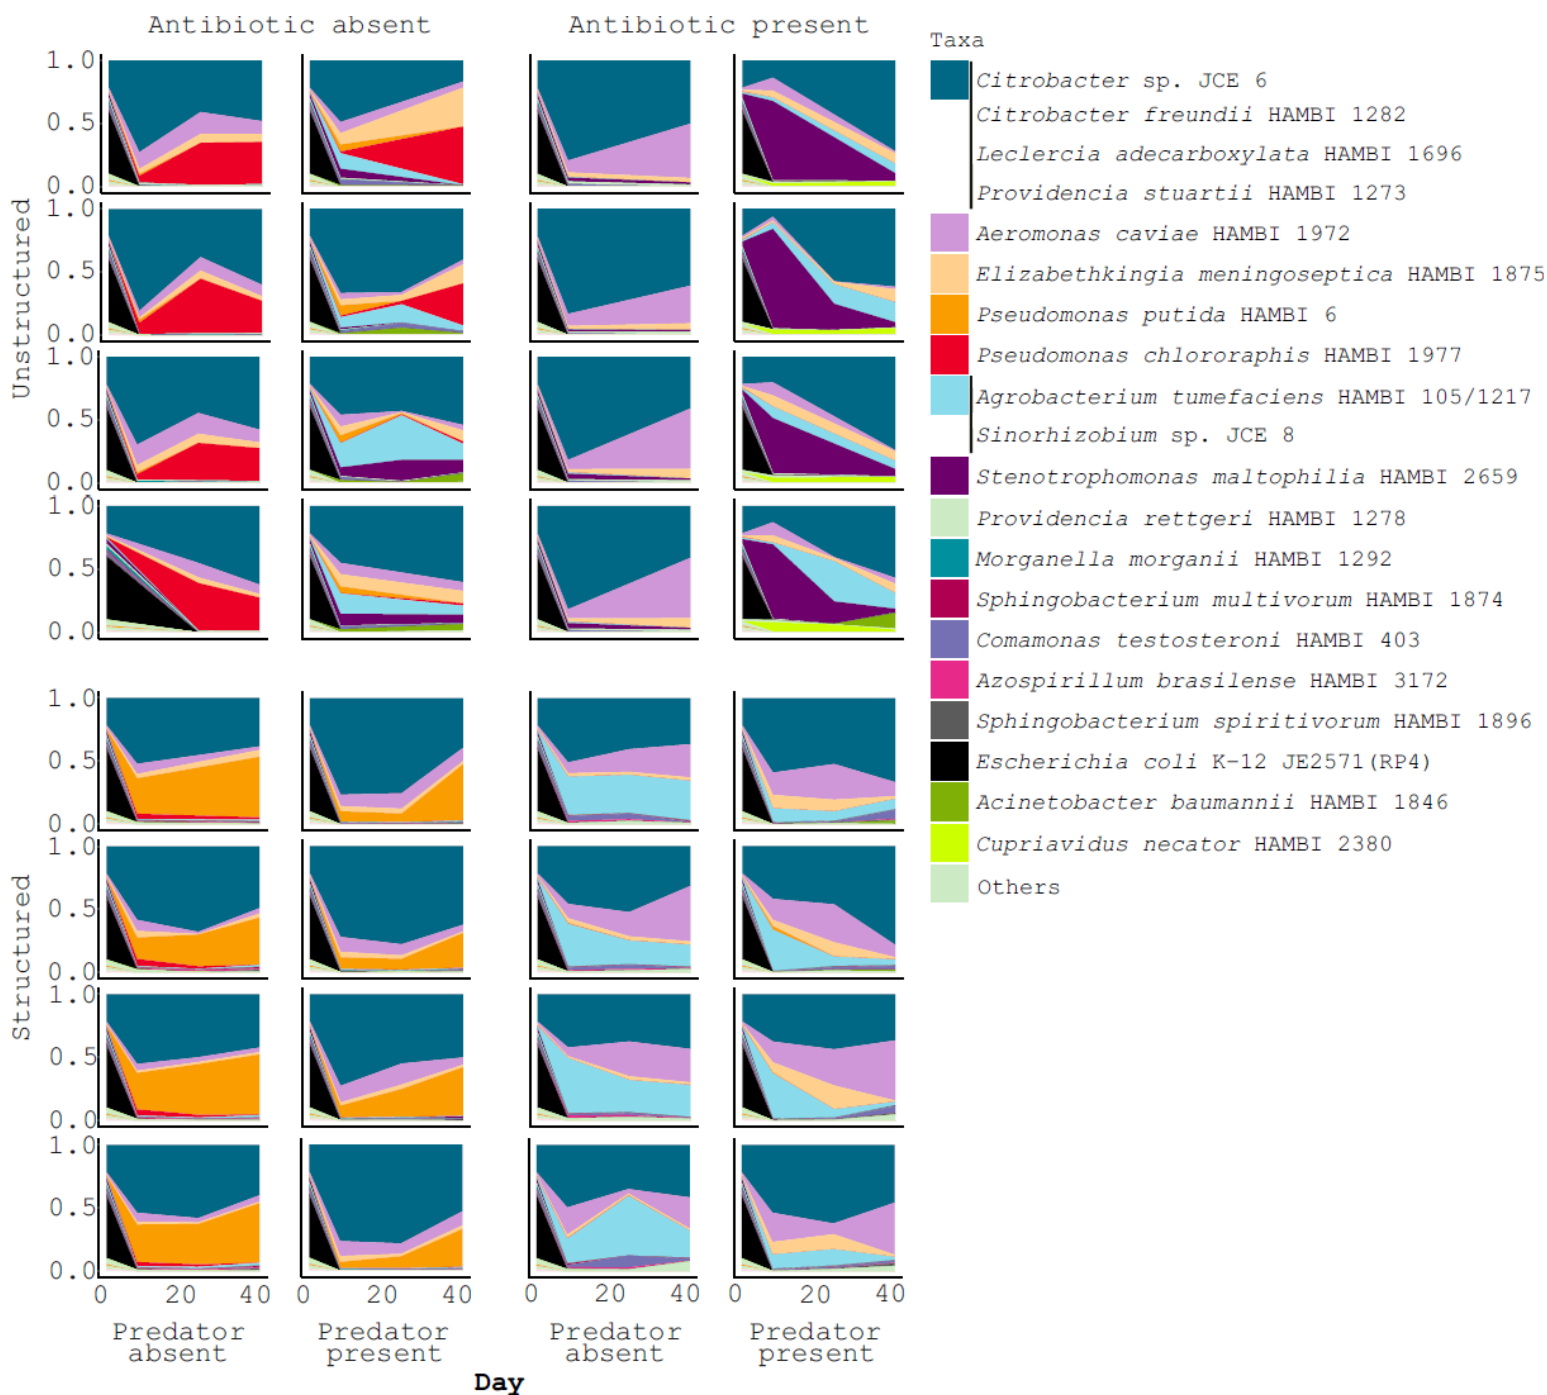

**Supplementary Figure 1.** Taxa across time points and treatments in 40-day microcosm experiment.

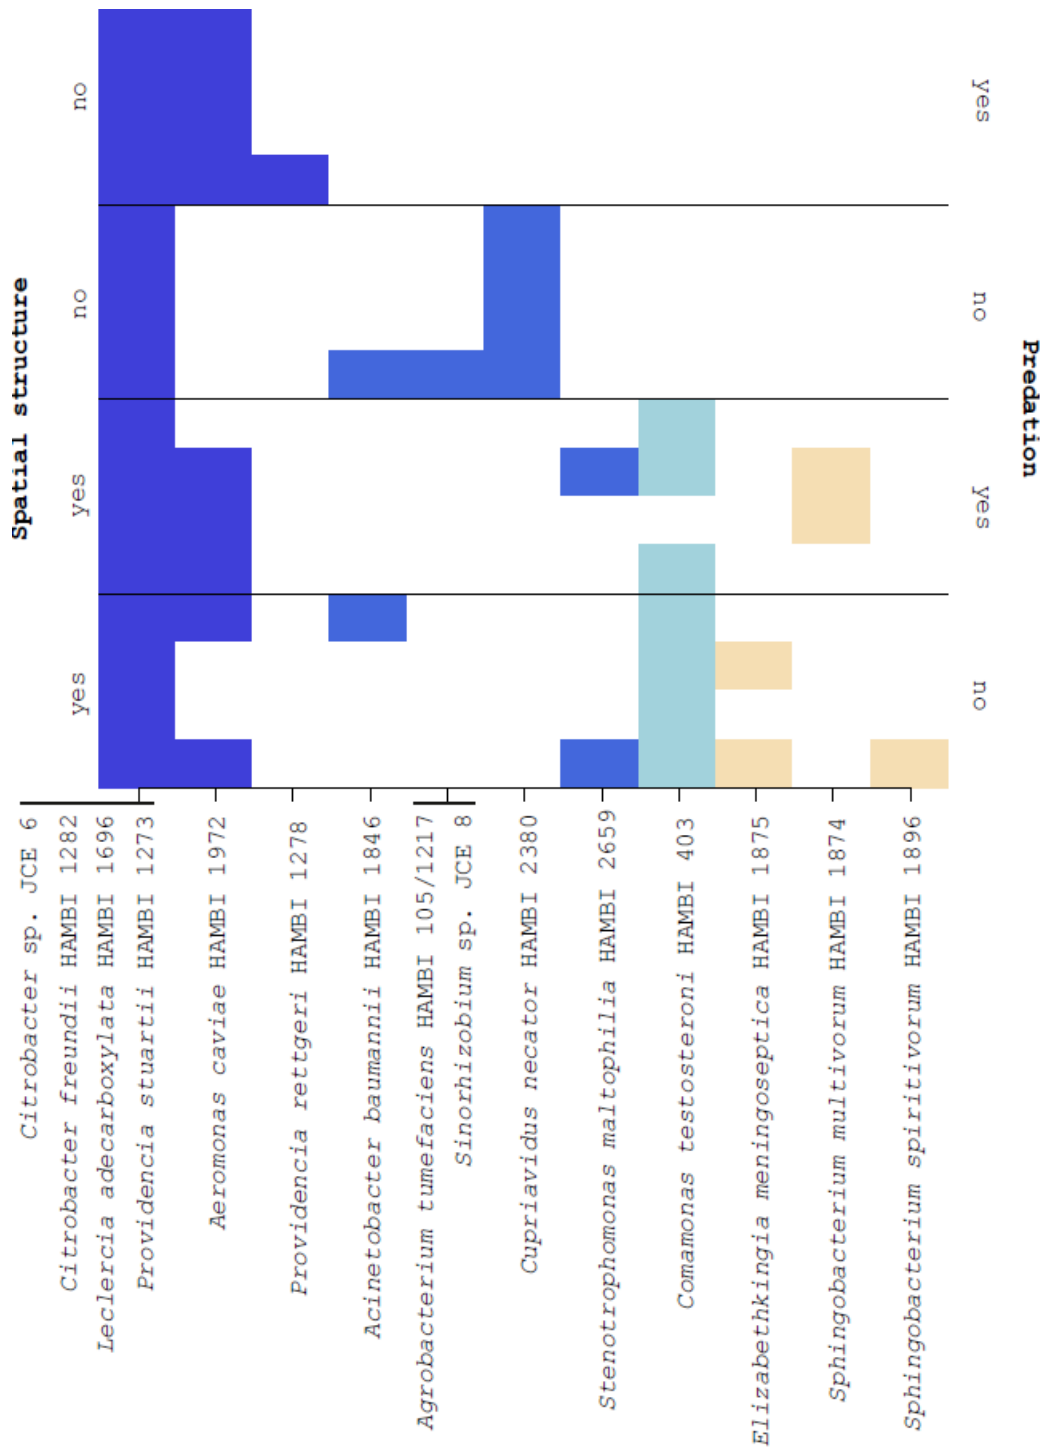

**Supplementary Figure 2.** Taxonomic distance of plasmid recipients from plasmid donor strain *Escherichia coli* JE2571(RP4) in the antibiotic treatment sub-treatments at the end-point of 40-day microcosm experiment. The distance is scaled from blue, indicating low distance, to yellow, indicating high distance.

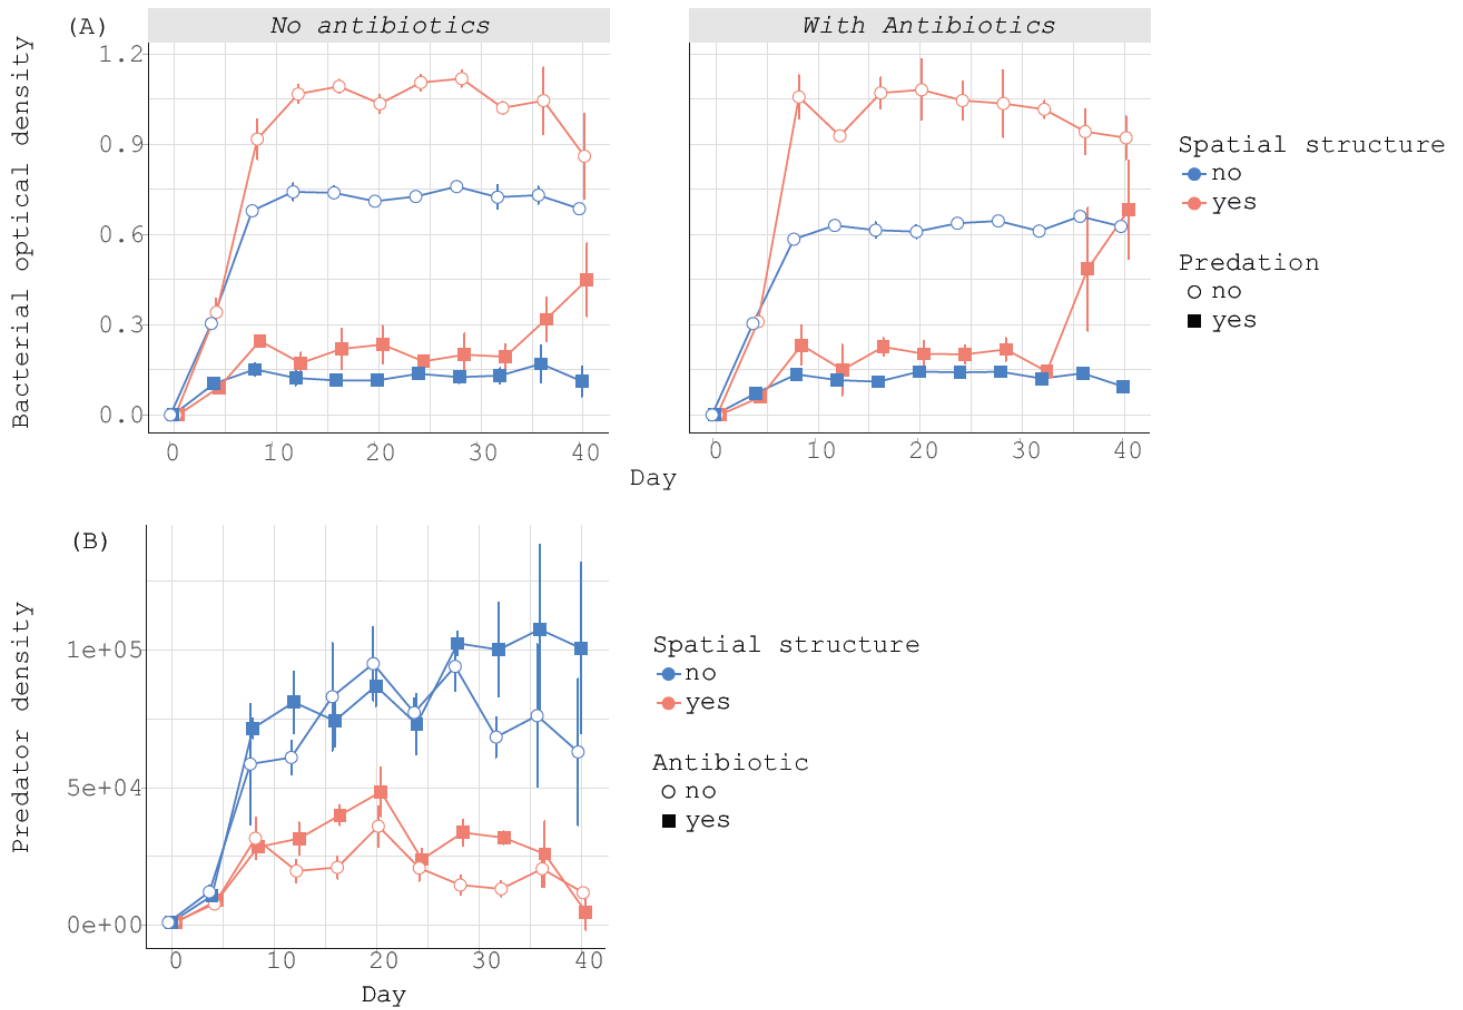

**Supplementary Figure 3.** (A) Density of bacteria and (B) ciliate predator across time points and treatments in 40-day microcosm experiment (mean  $\pm$  SD; N = 4 per treatment combination).

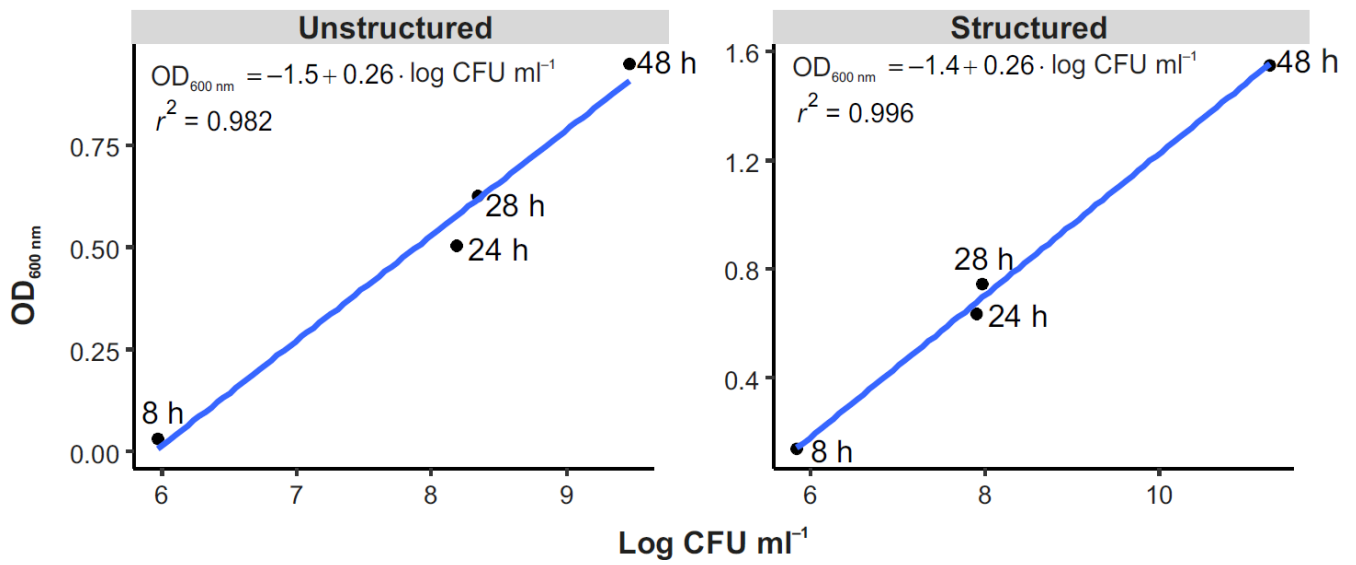

**Supplementary Figure 4.** Relationship between optical density (OD) at 600 nm and colony forming units (CFU) in the experimental conditions (medium, inoculum, temperature, treatment). The data points are averages of three replicated 48 h growth experiments in each environment (unstructured/structured).

**Supplementary Table 1.** MRM model of between-sample dissimilarity. Based on Bray&Curtis dissimilarity calculated over sqrt-transformed relative microbial abundances. Statistical significance was tested with 999 random permutations.

| Model terms                    | Df | MS   | <i>F</i> | <i>R</i> <sup>2</sup> | <i>P</i> |
|--------------------------------|----|------|----------|-----------------------|----------|
| Day                            | 1  | 0.17 | 7.82     | 0.03                  | 0.001    |
| Antibiotic                     | 1  | 1.15 | 53.73    | 0.19                  | 0.001    |
| Spatial structure              | 1  | 1.18 | 55.04    | 0.19                  | 0.001    |
| Predation                      | 1  | 0.44 | 20.71    | 0.07                  | 0.001    |
| Antibiotic × Space             | 1  | 0.55 | 25.64    | 0.09                  | 0.001    |
| Antibiotic × Predation         | 1  | 0.10 | 4.51     | 0.02                  | 0.003    |
| Space × Predation              | 1  | 0.76 | 35.54    | 0.13                  | 0.001    |
| Antibiotic × Space × Predation | 1  | 0.07 | 3.48     | 0.01                  | 0.003    |
| Residuals                      | 77 | 0.02 |          | 0.27                  |          |

**Supplementary Table 2.** Trait by treatment interaction estimates from the HMSC model and additionally for abundances using traitglm in the mvabund package.

| Method   | Treatment         | MIC value   | Growth rate | Biofilm formation |
|----------|-------------------|-------------|-------------|-------------------|
| HMSC     | Antibiotic        | 0.15        | 0.07        | 0.19              |
|          | Predation         | 0.18        | 0.13        | 0.06              |
|          | Spatial structure | <b>0.44</b> | <b>0.43</b> | 0.18              |
| traitglm | Antibiotic        | <b>0.25</b> | <b>0.26</b> | 0.15              |
|          | Predation         | <b>0.33</b> | 0.06        | 0.07              |
|          | Spatial structure | <b>0.23</b> | <b>0.42</b> | 0.11              |

**Supplementary Table 3.** Composition of HAMBI Mock Community (HMC) 62 created for this study.

| <b>Strain</b>                                                 | <b>Kanamycin MIC (<math>\mu\text{g ml}^{-1}</math>)</b> |
|---------------------------------------------------------------|---------------------------------------------------------|
| <i>Acinetobacter baumannii</i> HAMBI 1846 <sup>a</sup>        | 0.50                                                    |
| <i>Acinetobacter johnsonii</i> HAMBI 1969 <sup>a</sup>        | 0.50                                                    |
| <i>Acinetobacter lwoffii</i> HAMBI 97 <sup>a</sup>            | 0.38                                                    |
| <i>Aeromonas caviae</i> HAMBI 1972 <sup>a</sup>               | 1.0                                                     |
| <i>Aeromonas hydrophila</i> HAMBI 1847 <sup>a</sup>           | 1.5                                                     |
| <i>Agrobacterium tumefaciens</i> HAMBI 105 <sup>a</sup>       | 4.0                                                     |
| <i>Agrobacterium tumefaciens</i> HAMBI 1217 <sup>a</sup>      | 1.0                                                     |
| <i>Azorhizobium caulinodans</i> HAMBI 216 <sup>a</sup>        | 2.0                                                     |
| <i>Azospirillum brasilense</i> HAMBI 3172 <sup>a</sup>        | 2.0                                                     |
| <i>Bacillus</i> sp. JCE 7 <sup>b</sup>                        | 0.09                                                    |
| <i>Bacillus</i> sp. JCE 10 <sup>b</sup>                       | 0.50                                                    |
| <i>Bordetella avium</i> HAMBI 2160 <sup>a</sup>               | 4.0                                                     |
| <i>Brevundimonas bullata</i> HAMBI 262 <sup>a</sup>           | 0.75                                                    |
| <i>Burkholderia</i> sp. HAMBI 3356 <sup>a</sup>               | 0.75                                                    |
| <i>Burkholderia glumae</i> HAMBI 2369 <sup>a</sup>            | 1.0                                                     |
| <i>Buttiauxella agrestis</i> HAMBI 1320 <sup>a</sup>          | 1.5                                                     |
| <i>Chitinophaga filiformis</i> HAMBI 1966 <sup>a</sup>        | > 256                                                   |
| <i>Chitinophaga sancti</i> HAMBI 1988 <sup>a</sup>            | 64                                                      |
| <i>Chryseobacterium</i> sp. JCE 2 <sup>b</sup>                | 128                                                     |
| <i>Citrobacter</i> sp. JCE 6 <sup>b</sup>                     | 1.5                                                     |
| <i>Citrobacter amalonaticus</i> HAMBI 1296 <sup>a</sup>       | 1.5                                                     |
| <i>Citrobacter freundii</i> HAMBI 1282 <sup>a</sup>           | 0.75                                                    |
| <i>Citrobacter koseri</i> HAMBI 1287 <sup>a</sup>             | 1.5                                                     |
| <i>Comamonas testosteroni</i> HAMBI 403 <sup>a</sup>          | 4.0                                                     |
| <i>Cupriavidus necator</i> HAMBI 2164 <sup>a</sup>            | 4.0                                                     |
| <i>Cupriavidus necator</i> HAMBI 2380 <sup>a</sup>            | 0.38                                                    |
| <i>Elizabethkingia meningoseptica</i> HAMBI 1875 <sup>a</sup> | 128                                                     |
| <i>Escherichia coli</i> K-12 JE2571(RP4) <sup>31</sup>        | > 256                                                   |
| <i>Hafnia alvei</i> HAMBI 1279 <sup>a</sup>                   | 0.75                                                    |
| <i>Kluyvera intermedia</i> HAMBI 1299 <sup>a</sup>            | 3.0                                                     |
| <i>Leclercia adecarboxylata</i> HAMBI 1696 <sup>a</sup>       | 0.38                                                    |
| <i>Leclercia</i> sp. JCE 4 <sup>b</sup>                       | 0.75                                                    |
| <i>Lelliottia amnigena</i> HAMBI 1289 <sup>a</sup>            | 0.38                                                    |
| <i>Microvirga lotononidis</i> HAMBI 3237 <sup>a</sup>         | 8.0                                                     |

|                                                              |        |
|--------------------------------------------------------------|--------|
| <i>Moraxella canis</i> HAMBI 2792 <sup>a</sup>               | 0.25   |
| <i>Morganella morganii</i> HAMBI 1292 <sup>a</sup>           | 0.50   |
| <i>Myroides odoratus</i> HAMBI 1923 <sup>a</sup>             | 192    |
| <i>Niabella yanshanensis</i> HAMBI 3031 <sup>a</sup>         | > 256  |
| <i>Novosphingobium</i> sp. JCE 5 <sup>b</sup>                | 1.0    |
| <i>Paraburkholderia caryophylli</i> HAMBI 2159 <sup>a</sup>  | 1.0    |
| <i>Paraburkholderia kururiensis</i> HAMBI 2494 <sup>a</sup>  | 0.75   |
| <i>Paracoccus denitrificans</i> HAMBI 2443 <sup>a</sup>      | 0.75   |
| <i>Pectobacterium carotovorum</i> HAMBI 1429 <sup>a</sup>    | 0.75   |
| <i>Phyllobacterium myrsinacearum</i> HAMBI 1992 <sup>a</sup> | > 256  |
| <i>Proteus vulgaris</i> HAMBI 91 <sup>a</sup>                | 1.0    |
| <i>Providencia rettgeri</i> HAMBI 1278 <sup>a</sup>          | 1.5    |
| <i>Providencia stuartii</i> HAMBI 1273 <sup>a</sup>          | 1.5    |
| <i>Pseudomonas chlororaphis</i> HAMBI 1977 <sup>a</sup>      | 1.0    |
| <i>Pseudomonas putida</i> HAMBI 6 <sup>a</sup>               | 0.25   |
| <i>Psychrobacter proteolyticus</i> HAMBI 2948 <sup>a</sup>   | < 0.02 |
| <i>Roseomonas</i> sp. JCE 1 <sup>b</sup>                     | 128    |
| <i>Roseomonas gilardii</i> HAMBI 2470 <sup>a</sup>           | 2.0    |
| <i>Sinorhizobium</i> sp. JCE 8 <sup>b</sup>                  | 192    |
| <i>Sphingobacterium multivorum</i> HAMBI 1874 <sup>a</sup>   | > 256  |
| <i>Sphingobacterium spiritivorum</i> HAMBI 1896 <sup>a</sup> | > 256  |
| <i>Sphingobium yanoikuyae</i> HAMBI 1842 <sup>a</sup>        | 0.75   |
| <i>Staphylococcus</i> sp. JCE 3 <sup>b</sup>                 | 1.5    |
| <i>Staphylococcus</i> sp. JCE 9 <sup>b</sup>                 | 0.13   |
| <i>Staphylococcus</i> sp. JCE 11 <sup>b</sup>                | 0.25   |
| <i>Stenotrophomonas maltophilia</i> HAMBI 2659 <sup>a</sup>  | 16     |
| <i>Thermomonas haemolytica</i> HAMBI 2467 <sup>a</sup>       | 0.50   |
| <i>Yersinia ruckeri</i> HAMBI 1298 <sup>a</sup>              | 2.0    |

<sup>a</sup>HAMBI Culture Collection, University of Helsinki (UH).

<sup>b</sup>This study (strain available on request).

**Supplementary Table 4.** Primers used in epicPCR.

| epicPCR code        | Name                            | Sequence                                              | Source                  |
|---------------------|---------------------------------|-------------------------------------------------------|-------------------------|
| F1 <sup>a</sup>     | <i>aphA</i> _F1 <sup>*</sup>    | CGGTCTATCGGCTGCATAGCAAGTC                             | 1                       |
| R1-F2 <sup>b</sup>  | <i>aphA</i> _R1-F2 <sup>*</sup> | GWATTACCGCGGCKGCTGCAAGCCTCTCCTGAAGC<br>GAAGGTTTCG     | This study <sup>c</sup> |
| R2 <sup>d</sup>     | 1492R <sup>*</sup>              | GGTTACCTTGTTACGACTT                                   | 3                       |
| F3 <sup>e</sup>     | <i>aphA</i> _F3 <sup>**</sup>   | ATTGCTGATCGATACCAAG                                   | This study              |
| R3 <sup>f</sup>     | PE16S_V4_E786_R <sup>**</sup>   | CGGCATTCTGCTGAACCGCTCTCCGATCTGGACT<br>ACHVGGGTWTCTAAT | 3                       |
| blockF <sup>g</sup> | U519F-block10                   | TTTTTTTTTTTCAGCMGCCGCGTAATWC/3SpC3/                   | 3                       |
| blockR <sup>h</sup> | U519R-block10                   | TTTTTTTTTTTGWATTACCGCGGCKGCTG/3SpC3/                  | 3                       |

<sup>\*</sup>Product size 955 bp with *aphA* gene and V4–V8 region of 16S rRNA gene.

<sup>\*\*</sup>Product size 329 bp with *aphA* gene and V4 region of 16S rRNA gene.

<sup>a</sup>Functional target gene (*aphA* gene in PR4 plasmid) forward primer (fusion PCR).

<sup>b</sup>Functional target gene reverse primer with 16S rRNA gene forward primer overhang (fusion PCR linker primer).

<sup>c</sup>The *aphA* gene reverse primer from<sup>1</sup> is combined with the 16S rRNA overhang from<sup>3</sup>.

<sup>d</sup>16S rRNA gene reverse primer (fusion PCR).

<sup>e</sup>Target gene nested primer (nested/blocking PCR).

<sup>f</sup>16S rRNA gene nested primer (nested/blocking PCR).

<sup>g</sup>Blocking forward primer (nested/blocking PCR).

<sup>h</sup>Blocking reverse primer (nested/blocking PCR).



## Supplementary Methods

### Testing for presence of RP4 or other IncP-1 plasmids in non-donor strains

To control for the absence of the plasmid RP4 in non-donor strains, we performed PCR for the RP4-encoded kanamycin resistance gene *aphA*, using the plasmid donor as positive control. For this, single colonies of strains were cultured in proteose peptone yeast extract (PPY) medium (20 g proteose peptone and 2.5 g yeast extract in 1 l dH<sub>2</sub>O) for 48 h at 28 °C ( $\pm$  0.1 °C) with constant shaking at 150 r.p.m. DNA was extracted from 0.5 ml of medium containing a pool of 5–7 strains using PowerWater<sup>®</sup> DNA Isolation Kit (MoBio, Carlsbad, CA, USA). Samples were spun down, resuspended in 100  $\mu$ l of autoclaved dH<sub>2</sub>O, and transferred to PowerWater<sup>®</sup> Bead Tubes, after which extraction was performed according to the manufacturer's instructions. DNA concentrations were measured using the Qubit<sup>®</sup> 3.0 fluorometer (Thermo Fisher Scientific, Waltham, MA, USA). PCR was performed with 10–20 ng of template DNA, 1 U of Phusion Hot Start II DNA Polymerase (Thermo Fisher Scientific, Waltham, MA, USA), 0.2  $\mu$ M each of the *aphA* primers CGGTCTATCGGCTGCATAGCAAGTC and CAAGCCTCTCCTGAAGCG-AAGGTTCG<sup>1</sup> (product size 627 bp), and 200  $\mu$ M of dNTPs in a final volume of 50  $\mu$ l of 1 $\times$  5X Phusion HF Buffer. The cycling conditions (2-step protocol) were as follows: 98 °C for 30 s, and 35 cycles of 98 °C for 10 s and 72 °C for 30 s, with a final extension at 72 °C for 5 min.

Using the same DNA pools, we also tested for the presence of other plasmids in the same incompatibility group, IncP-1, which might explain the lack of plasmid transfer to certain strains in the community. For this, we used previously published primers targeting the *trfA* gene encoding the plasmid replication initiation protein: for subgroups  $\alpha$ ,  $\beta$  and  $\epsilon$ : TTCACSTTCTACGAGMTKTGCCA-GGAC and GWCAGCTTGCGGTACTTCTCCCA; for  $\gamma$ : TTCACSTTCTACGAGCTTTGCAGCGAC and GTCAGCTCGCGGTACTTCTCCCA; and for  $\delta$ : TTCACSTTCTACGAGCTTTGCACAGAC and GACAGCTCGCGGTACTTTTCCCA (product size 281 bp).<sup>2</sup> Notably, a positive control strain was lacking for the  $\gamma$  subgroup primers. PCR was performed with 2–5 ng of template DNA, 1.25 U of DreamTaq DNA Polymerase (Thermo Fisher Scientific, Waltham, MA, USA), 0.5  $\mu$ M each of the forward and reverse primers and 200  $\mu$ M of dNTPs in a final volume of 50  $\mu$ l of 1 $\times$  10X DreamTaq Buffer. The cycling conditions were as follows: initial denaturation 95 °C, 95 °C for 30 s, and 30 cycles of 95 °C for 30 s, 56 °C for 30 s, and 72 °C for 1 min, with a final extension at 72 °C for 5 min. All samples were negative for all primers except for the positive control strain.

## Supplementary References

- 1 Jalasvuori, M., Friman, V. P., Nieminen, A., Bamford, J. K. & Buckling, A. Bacteriophage selection against a plasmid-encoded sex apparatus leads to the loss of antibiotic-resistance plasmids. *Biol Lett* **7**, 902–905 (2011).
- 2 Bahl, M. I., Burmolle, M., Meisner, A., Hansen, L. H. & Sorensen, S. J. All IncP-1 plasmid subgroups, including the novel epsilon subgroup, are prevalent in the influent of a Danish wastewater treatment plant. *Plasmid* **62**, 134–139 (2009).
- 3 Spencer, S. J. *et al.* Massively parallel sequencing of single cells by epicPCR links functional genes with phylogenetic markers. *ISME J* **10**, 427–436 (2016).
